# Supplementary material
Source: Springer Nature journal article supplement (https://www.springermedizin.de/resource/supplementary/12881_2005_104_MOESM1_ESM.pdf/9452426)
Supplement: MOESM1 [file 9452426]

| General information                                   |                                                                                                                                                                                                                                                                                                                                  |
|-------------------------------------------------------|----------------------------------------------------------------------------------------------------------------------------------------------------------------------------------------------------------------------------------------------------------------------------------------------------------------------------------|
| <b>Gene name:</b>                                     | Succinate dehydrogenase complex, subunit D                                                                                                                                                                                                                                                                                       |
| <b>Gene symbol:</b>                                   | <b>SDHD</b>                                                                                                                                                                                                                                                                                                                      |
| <b>Chromosome Location:</b>                           | 11q22.3-23                                                                                                                                                                                                                                                                                                                       |
| <b>Database location:</b>                             | <a href="http://chromium.liacs.nl/lovd_sdh/">chromium.liacs.nl/lovd_sdh/</a>                                                                                                                                                                                                                                                     |
| <b>Curator:</b>                                       | <a href="#">Dr. J.P.L. Bayley</a> and <a href="#">Peter E.M. Taschner</a>                                                                                                                                                                                                                                                        |
| <b>Date of creation:</b>                              | January 05, 2005                                                                                                                                                                                                                                                                                                                 |
| <b>Last update:</b>                                   | <b>September 14, 2005</b>                                                                                                                                                                                                                                                                                                        |
| <b>Version:</b>                                       | <b>SDHD050914</b>                                                                                                                                                                                                                                                                                                                |
| <b>Add allelic variant:</b>                           | <a href="#">Submit an allelic variant</a>                                                                                                                                                                                                                                                                                        |
| <b>First time submitters:</b>                         | <a href="#">Register here</a>                                                                                                                                                                                                                                                                                                    |
| <b><a href="#">coding DNA reference sequence:</a></b> | SDHD reference sequence for describing allelic variants                                                                                                                                                                                                                                                                          |
| <b>Total number of allelic variants:</b>              | <b>116</b>                                                                                                                                                                                                                                                                                                                       |
| <b>Number of unique allelic variants:</b>             | <b>50</b>                                                                                                                                                                                                                                                                                                                        |
| <b>NOTE:</b>                                          | The allelic variants listed have been found in literature or were submitted directly to this database. When you notice any omissions or mistakes, please let us know (thank you).<br>Disclaimer: Inclusion of sequence variants in the SDH mutation database does not imply that there is convincing evidence for pathogenicity. |

#### Allelic variant tables

|                                                        |                                                                                                                          |
|--------------------------------------------------------|--------------------------------------------------------------------------------------------------------------------------|
| <b><a href="#">Complete allelic variant table:</a></b> | Listing of all allelic variants in the SDHD database                                                                     |
| <b><a href="#">Summary tables:</a></b>                 | Summary of all allelic variants in the SDHD database, sorted by type of variant (with graphical displays and statistics) |
| <b><a href="#">Polymorphism table:</a></b>             | Listing of all SDHD variants reported to have no noticeable phenotypic effect                                            |
